# Supplementary material
Source: PubMed Central journal article supplement (PMC11583808)
Supplement: NIHMS2036008-supplement-Supplementary_material.pdf [file NIHMS2036008-supplement-Supplementary_material.pdf]

Supplementary Materials for  
**Arenaviral infection causes bleeding in mice due to reduced serotonin release  
from platelets**

Roberto Aiolfi *et al.*

Corresponding author: Zaverio M. Ruggeri, [ruggeri@scripps.edu](mailto:ruggeri@scripps.edu); Luca G. Guidotti, [guidotti.luca@hsr.it](mailto:guidotti.luca@hsr.it)

*Sci. Signal.* **15**, eabb0384 (2022)  
DOI: [10.1126/scisignal.abb0384](https://doi.org/10.1126/scisignal.abb0384)

**This PDF file includes:**

Figs. S1 to S6

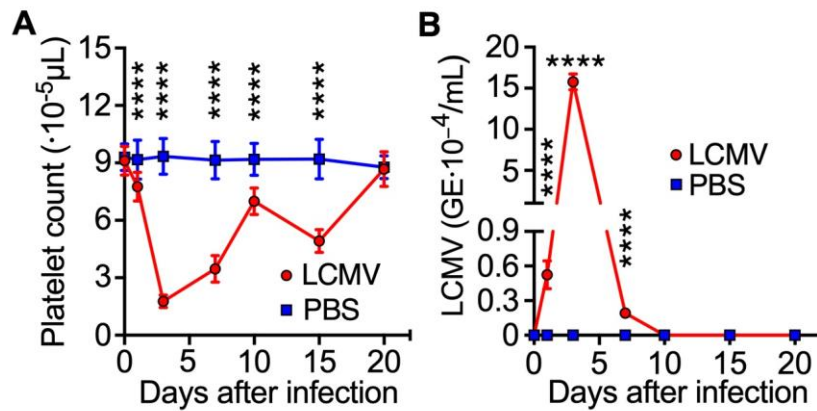

**Supplementary Figure 1. Blood platelet count and viral genome content after LCMV infection.** WT mice were injected with  $5 \cdot 10^5$  pfu LCMV Arm (red circles) or control PBS (blue squares). Blood samples were taken at different time points after treatment to count platelets (10 control and 35 infected mice) (**A**) and to measure LCMV Arm genome equivalent (GE; 4 control and 9 infected mice) (**B**). Data shown as mean  $\pm$ SD were analyzed by repeated measures two-way ANOVA with the Geisser-Greenhouse correction for no assumption of sphericity and Šidák's post-test for multiple paired comparisons at different time points. \*\*\*\*P<0.0001.

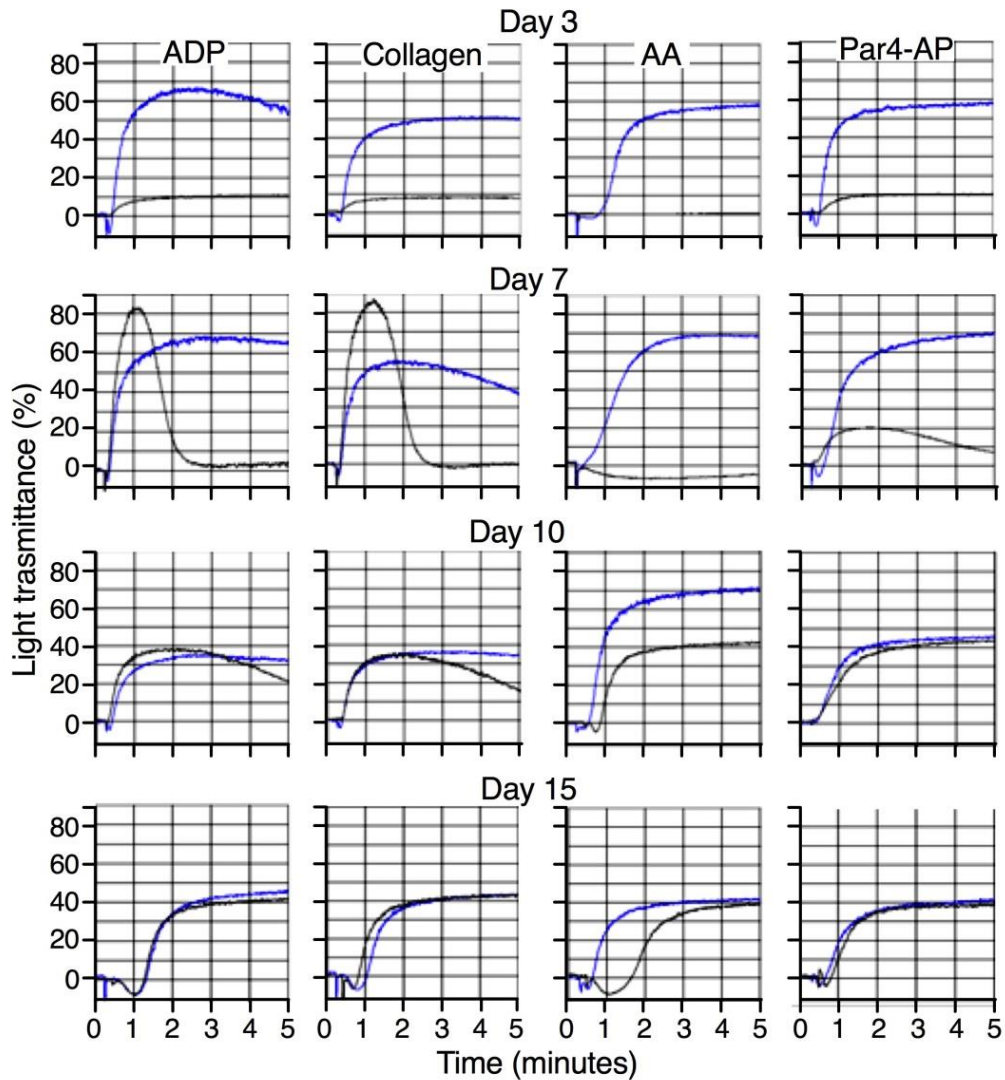

**Supplementary Figure 2. Representative traces of platelet aggregation at different time points after LCMV infection.** Platelets in PRP of WT mice infected with LCMV (black traces) or injected with PBS as control (blue traces) were stimulated with 5  $\mu$ M ADP, 4  $\mu$ g/ml collagen, 75  $\mu$ M arachidonic acid (AA) or 40  $\mu$ M protease-activated receptor 4 activation peptide (Par4-AP). Blood samples (n =10 mice for each condition) were collected at the indicated days after infection for testing.

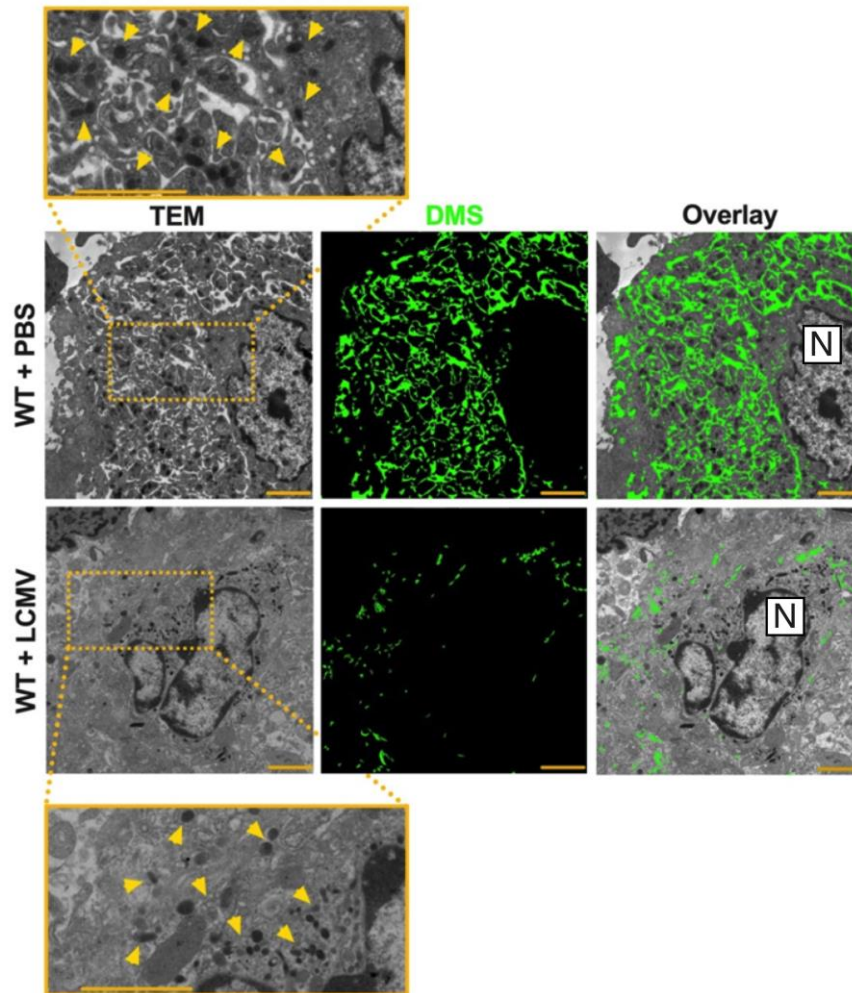

**Supplementary Figure 3. Transmission electron microscopy (TEM) of megakaryocytes after LCMV infection.** Representative micrographs of megakaryocytes isolated from the bone marrow of WT mice infected with  $5 \cdot 10^5$  pfu LCMV Arm or injected with PBS as control. Left: The megakaryocytes of infected mice (WT+LCMV) compared to controls (WT+PBS) show a poorly delineated demarcation membrane system (DMS) and a reduced number of storage granules localized predominantly in close proximity to the nucleus. The magnified highlighted areas allow a clearer visualization of the granules, of which some clusters are highlighted by yellow arrowheads. Middle: Selective visualization of the DMS using a green mask highlights the difference between infected and control mice. Right: Overlay of the corresponding left and middle panels. N = Nucleus. Scale bar (in orange) = 2  $\mu$ m. (n = 41-85 platelet sections, isolated from 3 mice per group).

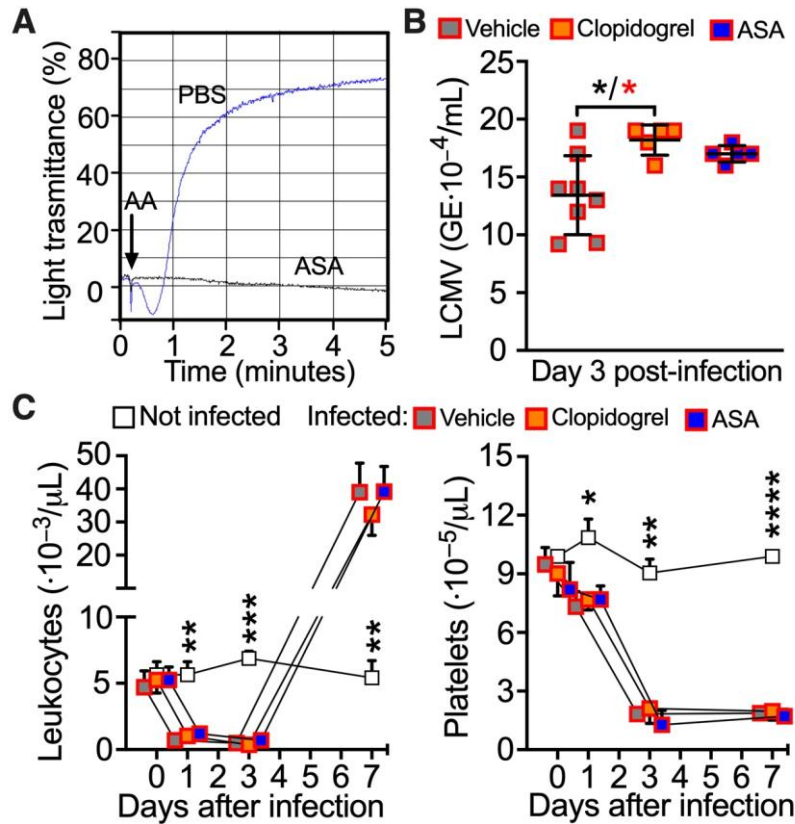

**Supplementary Figure 4. Viral replication and blood counts of leukocytes and platelets in LCMV-infected mice treated with aspirin or clopidogrel.** (A) Arachidonic acid-induced aggregation (AA, 75 μM) of platelet-rich plasma from WT mice treated with aspirin (ASA, 10 mg/kg/day intraperitoneally; black trace) or ASA vehicle (PBS; blue trace). (B) LCMV Arm genome equivalent (GE) measured 3 days after infection in blood of WT mice treated with ASA (n =5); or clopidogrel, 60 μg/day in drinking water (n=5); or ASA vehicle (n=8). (C) Blood counts of leukocytes (left) and platelets (right) in untreated WT mice injected with PBS (not infected; n =4, left and n =3, right) compared to mice treated with ASA or clopidogrel or ASA vehicle from two days before LCMV infection (for all groups, n =4, left and n=5, right). Data in (B) and (C) are shown as scatter plots with mean ± SD of values measured at the indicated time points. Statistical analysis in (B) was performed by Brown-Forsythe ANOVA with Welch's correction and Dunnett's T3 test for multiple comparisons; and by non-parametric Kruskal-Wallis test followed by Dunn's test for multiple comparisons (black and red asterisk, respectively). Data in (C) were analyzed by repeated measures two-way ANOVA with the Geisser-Greenhouse correction for no assumption of sphericity and Dunnett's post-test for multiple paired comparisons of infected vs. non infected groups (significance indicated by asterisks); infected mice treated with aspirin or clopidogrel were not significantly different from those treated with vehicle control. \*P<0.05; \*\*P<0.01; \*\*\*P<0.001; \*\*\*\*P<0.0001.

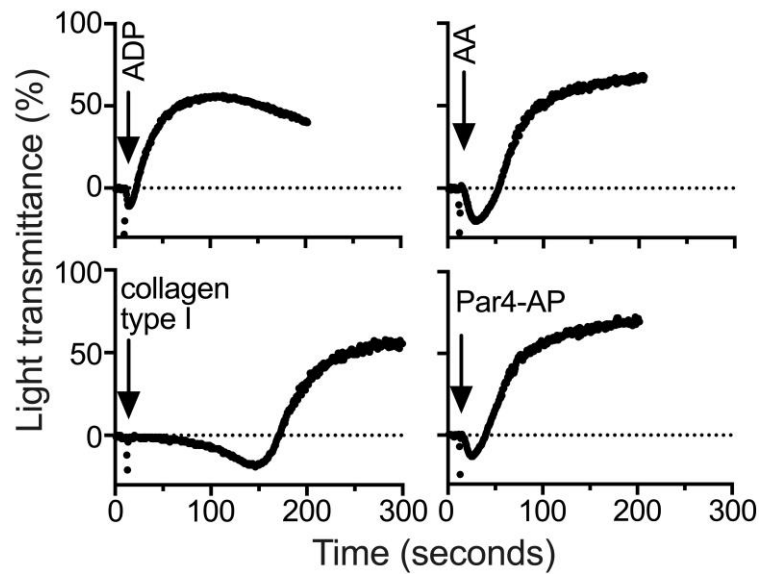

**Supplementary Figure 5. Functionality of mouse platelets used for transfusion.** Blood collected from WT mice was pooled and platelets were washed free of plasma and other blood cells by sequential centrifugation and resuspension in buffer. The response to agonist-induced activation was evaluated with 5  $\mu$ M ADP, 4  $\mu$ g/ml collagen, 75  $\mu$ M arachidonic acid and 40  $\mu$ M protease-activated receptor 4 activation peptide (Par4-AP). Representative traces of platelet aggregation are shown; note the delayed response to collagen compared to fig. S6D, which was likely a consequence of the procedure to isolate washed platelets, but in the context of an overall good response to agonist-induced activation.

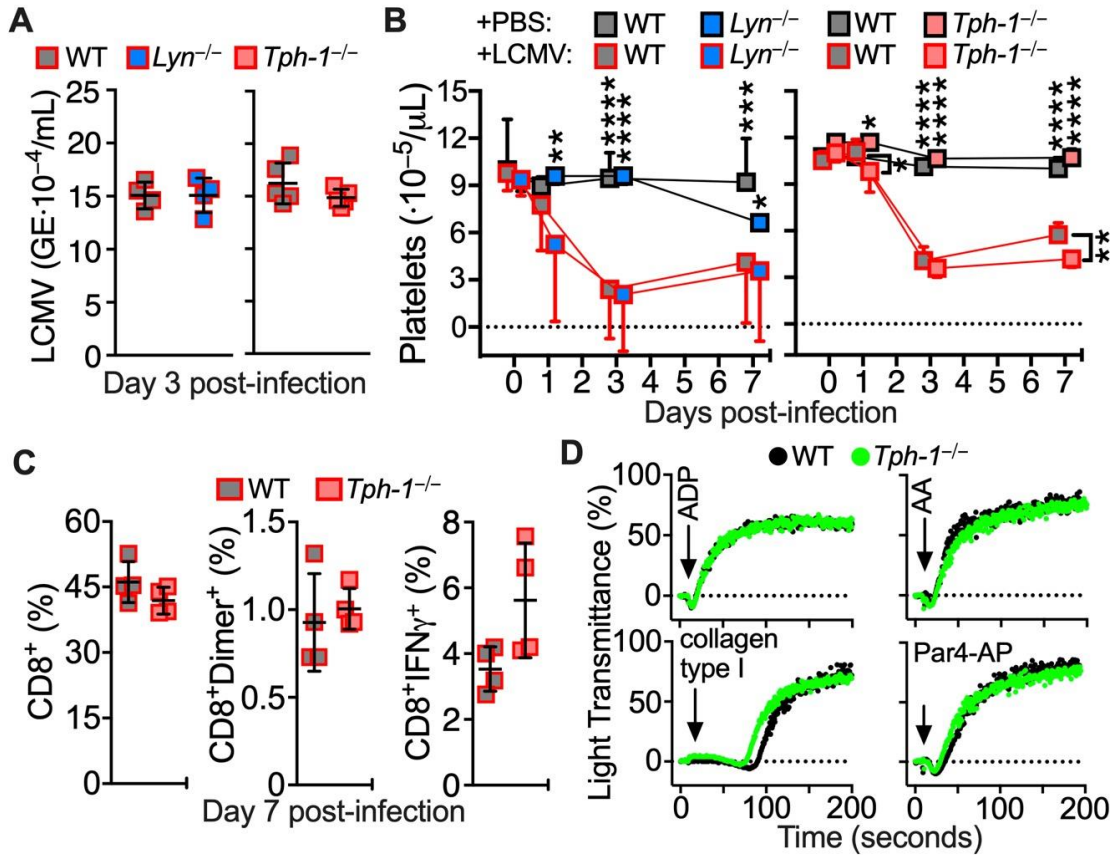

**Supplementary Figure 6. Parameters of LCMV infection and baseline platelet aggregation in WT and mutant mice.** (A) Comparison of viral genome equivalent (GE) in blood 3 days after LCMV infection in WT/*Lyn*<sup>-/-</sup> (n=4; left) and WT/*Tph-1*<sup>-/-</sup> mice (n=5; right). (B) Comparison of platelet count variations after injection of LCMV Arm or control PBS in WT/*Lyn*<sup>-/-</sup> (left; WT n=15 infected, 10 noninfected, *Lyn*<sup>-/-</sup> n=20 infected, 10 noninfected) and WT/*Tph-1*<sup>-/-</sup> mice (right; WT and *Tph-1*<sup>-/-</sup> n=6 infected, 3 noninfected). (C) CD8<sup>+</sup> (left), CD8<sup>+</sup>Dimer<sup>+</sup> (middle) and CD8<sup>+</sup>IFNγ<sup>+</sup> T-lymphocytes (the latter induced by virus-specific H2b-restricted peptide GP33-41) measured as percentage of mononuclear cells isolated from peripheral blood of WT and *Tph-1*<sup>-/-</sup> mice 7 days after injection of LCMV Arm (n=4 per group). Data, shown as mean ± SD, were analyzed by two-tailed Mann-Whitney test (A, C; no significant difference) or repeated measures two-way ANOVA with Tukey's post-test for multiple PBS compared to LCMV comparisons (B); \*P<0.05; \*\*P<0.01; \*\*\*P<0.001; \*\*\*\*P<0.0001. Asterisks on top of symbols refer to comparisons before/after infection in the same strain; asterisks on the side of symbols refer to comparisons after infection between strains. (D) Representative platelet aggregation traces in PRP from untreated WT (black) or *Tph-1*<sup>-/-</sup> (green) mice stimulated with 5 μM ADP, 75 μM arachidonic acid (AA), 4 μg/ml collagen or 40 μM protease-activated receptor 4 activation peptide (Par4-AP); n=4 mice per group.
